# Supplementary material
Source: PubMed Central journal article supplement (PMC4966433)
Supplement: JB.00329-16_zjb999094130so1.pdf [file JB.00329-16_zjb999094130so1.pdf]

**Supplemental material for:**

Functional interaction between the cytoplasmic ABC protein LptB and the inner membrane LptC protein, components of the lipopolysaccharide transport machinery in *Escherichia coli*

Alessandra M. Martorana<sup>a</sup>, Mattia Benedet<sup>b1</sup>, Elisa A. Maccagni<sup>a</sup>, Paola Sperandeo<sup>a2</sup>, Riccardo Villa<sup>b3</sup>, Gianni Dehò<sup>b</sup>, and Alessandra Polissi<sup>a#2</sup>

Dipartimento di Biotecnologie e Bioscienze, Università degli Studi di Milano-Bicocca, Milan, Italy<sup>a</sup>; Dipartimento di Bioscienze, Università degli Studi di Milano, Milan, Italy<sup>b</sup>

Present address

<sup>1</sup>Centre for Integrative Biology, Università degli Studi di Trento, Trento, Italy

<sup>2</sup>Dipartimento di Scienze Farmacologiche e Biomolecolari, Università degli Studi di Milano, Milan, Italy

<sup>3</sup>Frau Pharma, Via Trivulzina 13 - Agrate Brianza (MB), Italy

Running Head: Functional interaction between LptB and LptC

#Address correspondence to: Alessandra Polissi, [alessandra.polissi@unimib.it](mailto:alessandra.polissi@unimib.it)

**Table S1. Oligonucleotides**

| Name  | Sequence (5'-3') <sup>a</sup>                                           | Use and/or description                                                                                 |
|-------|-------------------------------------------------------------------------|--------------------------------------------------------------------------------------------------------|
| AP23  | CGATCCCCGCGGTTATAGCAAAAGCAGAGAAC                                        | Amplification of Tn-SS2 left junctions in ST-190, with FG1676                                          |
| AP63  | <b>gtgatcacatctagat</b> CAGTGGTGGTGGTGGTGGTG<br>AGGCTGAGTTTGTGGTTTGGTTG | Construction of His tagged chimeras; <i>XbaI</i>                                                       |
| AP91  | CATCGGCTCGTATAATGTG                                                     | Construction of pGS200 derivatives                                                                     |
| AP92  | CTGCGTTCTGATTTAATCTG                                                    | Construction of pGS200 derivatives                                                                     |
| AP175 | <b>cgagagaggaattcaccatgcccgaagacactacgc</b>                             | <i>Pa</i> -LptC and <i>Pa</i> -LptC-H construction for pGS111, pGS200, pGS403 and pGS456; <i>EcoRI</i> |
| AP176 | <b>aagcttctagattaacgaacctcatgctgacc</b>                                 | <i>Pa</i> -LptC construction for pGS111, pGS403 and pGS456; <i>XbaI</i>                                |
| AP179 | CAATTTCCCCGGAGTTG                                                       | Amplification of Tn-SS2 right junctions in ST-190, with FG690                                          |
| AP182 | TATTACCCTTCTTCTGTG                                                      | Sequencing of Tn-SS2 right junction in ST-190                                                          |
| AP191 | AAGGATAAAATCCCGACAtggcacatccagagegcc                                    | CPP construction                                                                                       |
| AP192 | ggcgctctggatgtgccaTGTCGGGATTTTATCCTT                                    | CPP construction                                                                                       |
| AP193 | CCCGACAAGAATTATGCAacctetgaagacctcgtc                                    | CPC and PPC construction                                                                               |
| AP194 | gacgaggtcttcagaggtGCATAATTCTTGTCCGGG                                    | CPC, and PPC construction                                                                              |
| AP195 | CGTGGCAACGTGCAACCCtggtcgtaaaagcagat                                     | PCC construction                                                                                       |
| AP196 | atctgctttacggaccaGGGTTGCACGTTGCCACG                                     | PCC construction                                                                                       |
| AP197 | CTGGTGACGCAGGATGTT cagaccgagcaagccgtt                                   | PCP and CCP construction                                                                               |
| AP198 | aacggcttgctcggtctg AACATCCTGCGTCACCAG                                   | PCP and CCP construction                                                                               |
| AP237 | <b>aagcttctaga</b> TCAGTGGTGGTGGTGGTGGTG<br>acgaacctcatgctgacct         | <i>Pa</i> -LptC-H construction for pGS200; <i>XbaI</i>                                                 |
| AP317 | GCGCATCCACTGTTGATCCCCG                                                  | Sequencing of Tn-SS2 left junction in ST-190                                                           |
| AP329 | <b>gaattcacc</b> ATGAAATTCAAACAAACAAACTC                                | LptA-HA construction for pBAD24LptHA; <i>EcoRI</i>                                                     |
| AP330 | <b>aagctt</b> TTAAGCGTAATCTGGAACATCGTATGGGTAATTACCC<br>TTCTTCTGTGCCGGGG | LptA-HA construction for pBAD24LptHA; <i>HindIII</i>                                                   |
| AP361 | <b>cccaagcttctaga</b> TCAGTGGTGGTGGTGGTGGTGCTGAACATC<br>CTGCGTCACC      | CC-H construction for pGS208H; <i>HindIII</i>                                                          |
| AP363 | <b>cccaagcttctaga</b> TCAAACATCCTGCGTCACC                               | CC- construction for pGS208; <i>HindIII</i>                                                            |
| AP467 | CAGGAAGCCTCCATTGCCCGTCGCCTCAGCG                                         | pGS429-LptB <sup>F90A</sup> and pGS431-LptB <sup>F90A</sup> construction, with AP468                   |

|        |                                                              |                                                                                                                                   |
|--------|--------------------------------------------------------------|-----------------------------------------------------------------------------------------------------------------------------------|
| AP468  | CGCTGAGGCGACGGGCAATGGAGGCTTCCTG                              | pGS429-LptB <sup>F90A</sup> and pGS431-LptB <sup>F90A</sup> construction, with AP467                                              |
| AP469  | CAGGAAGCCTCCATTACCGTCGCCTCAGCG                               | pGS429-LptB <sup>F90Y</sup> and pGS431-LptB <sup>F90Y</sup> construction, with AP470                                              |
| AP470  | CGCTGAGGCGACGGTAAATGGAGGCTTCCTG                              | pGS429-LptB <sup>F90Y</sup> and pGS431-LptB <sup>F90Y</sup> construction, with AP469                                              |
| AP471  | CGAAATTTATTCTGCTCGACCAACCGTTTGCCGGGG                         | pGS429-LptB <sup>E163Q</sup> and pGS431-LptB <sup>E163Q</sup> construction, with AP472                                            |
| AP472  | CCCCGGCAAACGGTTGGTCGAGCAGAATAAATTCG                          | pGS429-LptB <sup>E163Q</sup> and pGS431-LptB <sup>E163Q</sup> construction, with AP471                                            |
| FG575  | CAACTCTCTACTGTTTCTCCATACCC                                   | Sequencing of Tn-SS2 right junction in ST-190                                                                                     |
| FG687  | TTGTGCCCAGTCATAGCCGAATAGCCT                                  | Sequencing of Tn-SS2 left junction in ST-190                                                                                      |
| FG690  | GCCAGTTAAGCCATTCATGCCAGTAGG                                  | Amplification of Tn-SS2 right junctions in ST-190, with FG690                                                                     |
| FG1676 | CCACAGTCGATGAATCCAGA                                         | Amplification of Tn-SS2 left junctions in ST-190, with FG1676                                                                     |
| FG2935 | <b>catattcgtctcgtcgacacc</b> ATGAAATTCAAACAAACAAACTCA<br>GCC | <i>lptA</i> and <i>lptAB</i> construction for pGS407, pGS413, pGS414 and pGS415; <i>Esp3I-SalI</i>                                |
| FG2936 | <b>ggcettegtctcaagett</b> TTAATTACCCTTCTTCTGTGCCG            | <i>lptA</i> construction for pGS407; <i>Esp3I-HindIII</i>                                                                         |
| FG2978 | <b>catattcgtctcgaattcacc</b> ATGAGTAAAGCCAGACGTTGGG          | <i>lptC190N</i> and <i>lptC</i> <sup>139-191</sup> construction for pGS408, pGS411, pGS417, pGS418 and pGS419; <i>Esp3I-EcoRI</i> |
| FG2979 | <b>caggttcgtctctctaga</b> TCAATCAATCACCGGATCCCC              | <i>lptC190N</i> construction for pGS408 and pGS411; <i>Esp3I-XbaI</i>                                                             |
| FG3058 | <b>ccttcgtctcaagett</b> TCAGAGTCTGAAGTCTTCCCC                | <i>lptAB</i> construction for pGS413, pGS414 and pGS415; <i>Esp3I-HindIII</i>                                                     |
| FG3088 | <b>caggttcgtctctctaga</b> TTAGAGATTGATCTGCGCGTTATC           | <i>lptC</i> <sup>139-191</sup> construction for pGS417, pGS418, pGS419, pGS431; <i>Esp3I-XbaI</i>                                 |

<sup>a</sup> Upper case, *E. coli* genomic sequence; lower case, *P. aeruginosa* genomic sequence; bold lower case, oligonucleotide tail; lower bold underlined case, restriction site; italic upper case, HA or 6xHis coding sequence

Fig. S1A

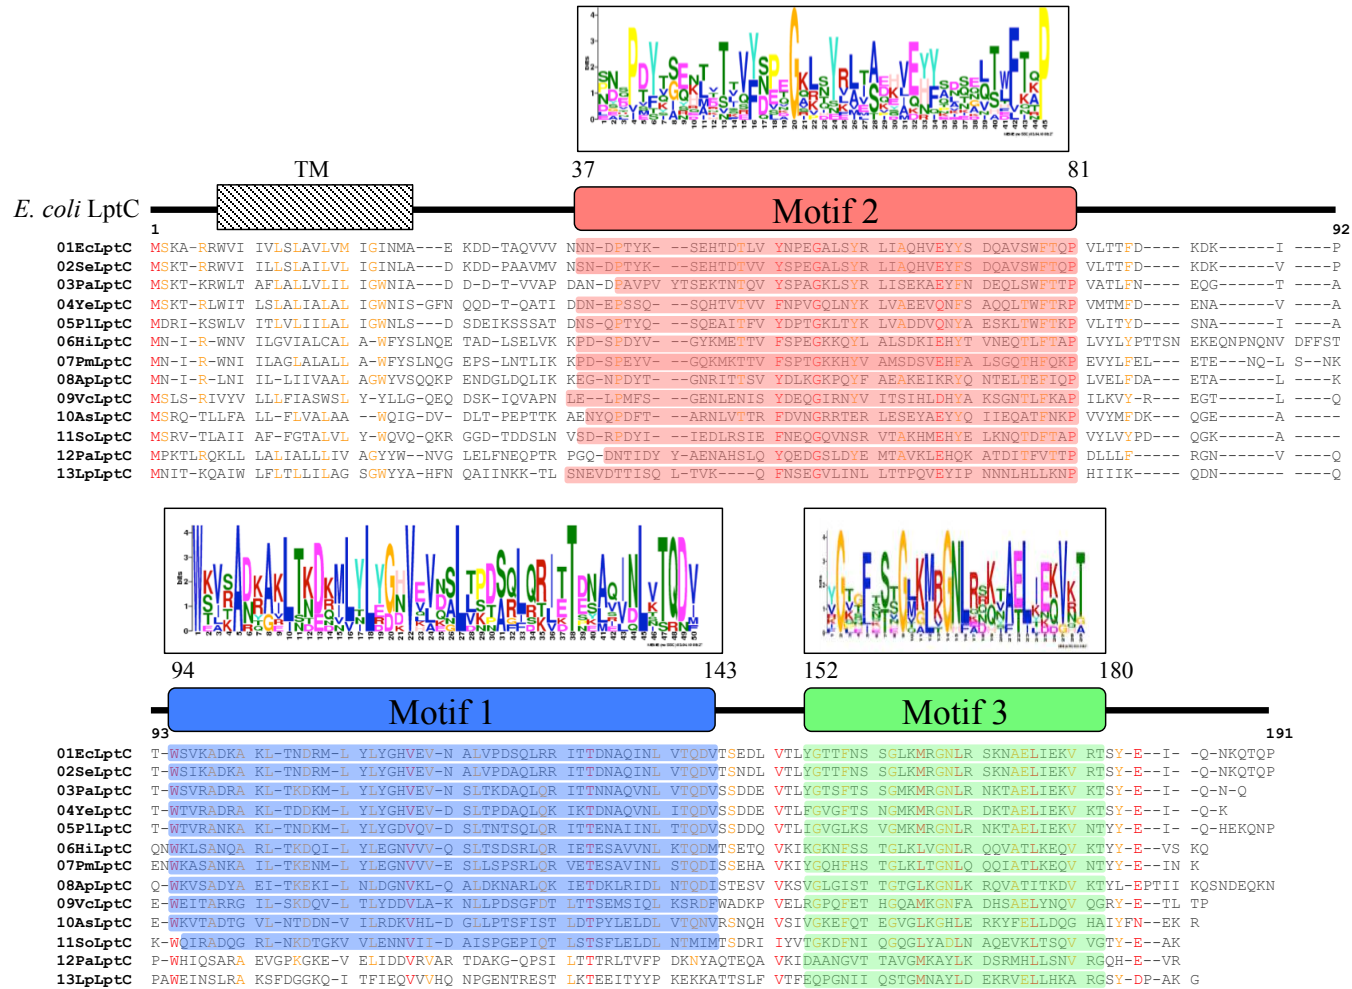

Fig. S1B

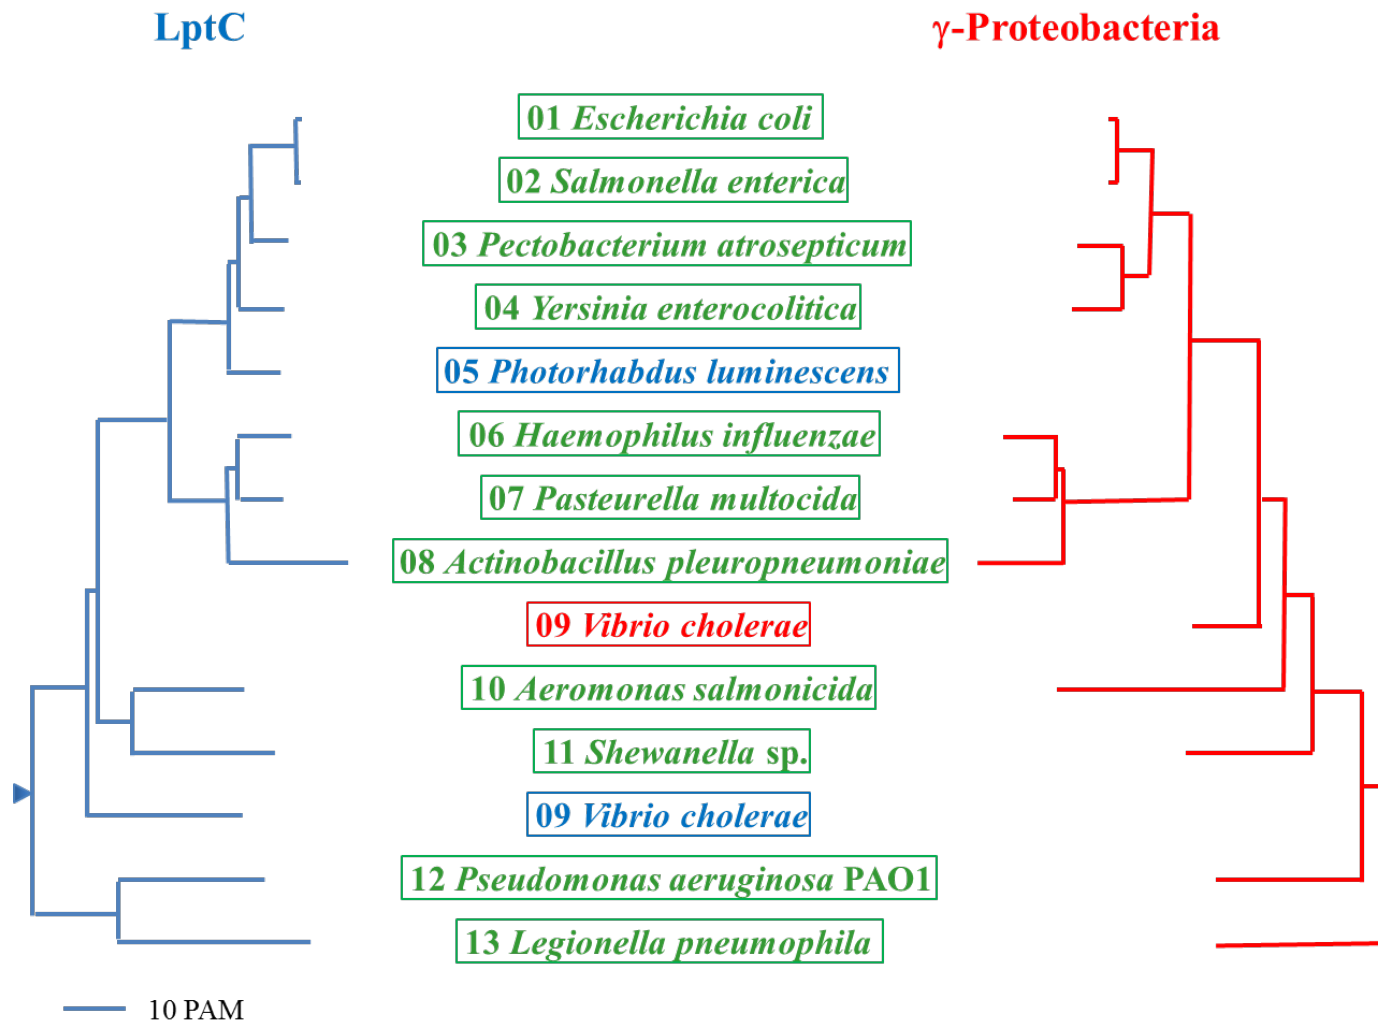

**Figure S1. Features of LptC homologues from representative  $\gamma$ -Proteobacteria.**

**(A) Motifs predicted in *E. coli* LptC by MM algorithm.** Multiple sequence alignment between LptC orthologues of 13  $\gamma$ -Proteobacteria by Multalin and the Motifs predicted in *E. coli* LptC by MM algorithm are shown (see Materials and Methods for details). Sequence codes and Uniprot Accession Numbers are provided in brackets as follow: *E. coli* (01EcLptC, LPTC\_ECOLI), *S. enterica* (02SeLptC, A9N767\_SALPB), *Pectobacterium atrosepticum* (03PaLptC, Q6DAG2\_PECAS), *Yersinia enterocolitica* (04YeLptC, A1JRC3\_YERE8), *Photorhabdus luminescens* (05PiLptC, Q7N059\_PHOLL), *Haemophilus influenzae* (06HiLptC, Q4QLE6\_HAEI8), *Pasteurella multocida* (07PmLptC, V4PYQ4\_PASMD), *Actinobacillus pleuropneumoniae* (08ApLptC, A3MZ56\_ACTP2), *Vibrio cholerae* O1 (09VcLptC, C3NV80\_VIBCJ), *Aeromonas salmonicida* (10AsLptC, A4SHX4\_AERS4), *Shewanella* sp. (11SoLptC, Q0HRC7\_SHESR), *P. aeruginosa* PAO1 (12PaLptC, Q9HVV8\_PSEAE), *Legionella pneumophila* (13LpLptC, D5TAY1\_LEGP2). Conserved (50%) and highly conserved (90%) residues are depicted in orange and red, respectively. TM (Transmembrane Region, from residue 7 to 25), Motif 2 (from residue 37 to 81), Motif 1 (from residue 94 to 143), Motif 3 (from 152 to 180) are indicated. Consensus polypeptides from each motif are represented as a sequence logo graphic in which the relative size of the letters correlates with their frequency in the sequences.

**(B) Dendrograms of LptC homologues genetic distance and phylogeny of representative  $\gamma$ -Proteobacteria.** Genetic distance between LptC homologues was derived from the multialignment depicted above (S1A) using blosum62 as substitution matrix. The arrowhead points to the root of the LptC tree (left). The minimal distance between sequences is 20 PAM (percent accepted mutation). The phylogenetic tree of the representative  $\gamma$ -Proteobacteria (right) is from (1). In this tree the genus *Photorhabdus*, an insect pathogen living in an entomopathogenic nematode and belonging to the Enterobacteriaceae, was omitted in order to stabilize the phylogenetic tree. Notwithstanding some topological difference in the dendrograms (see for example *Vibrio cholerae*) the LptC homologues genetic distances fit the phylogenetic distances of the  $\gamma$ -Proteobacteria.

**A**

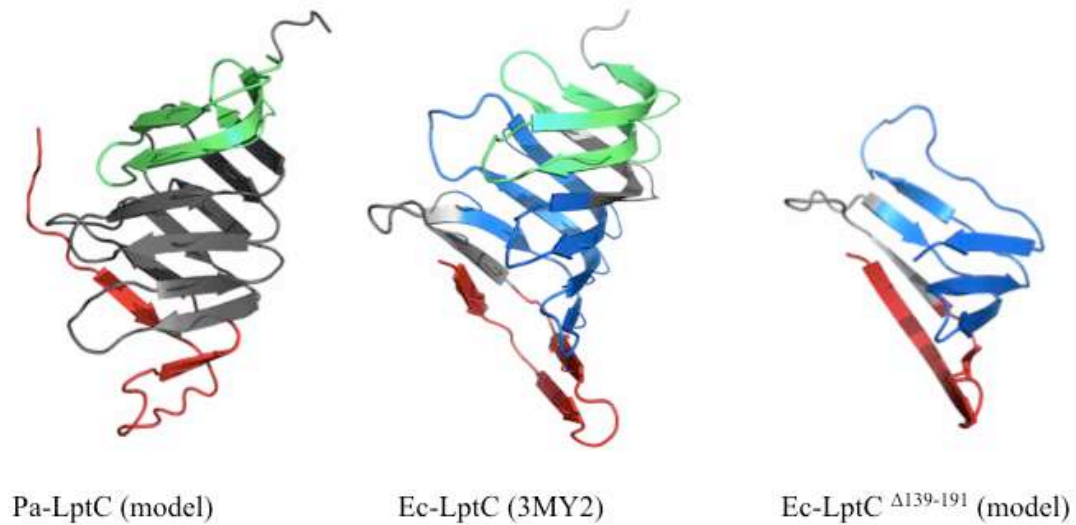

**B**

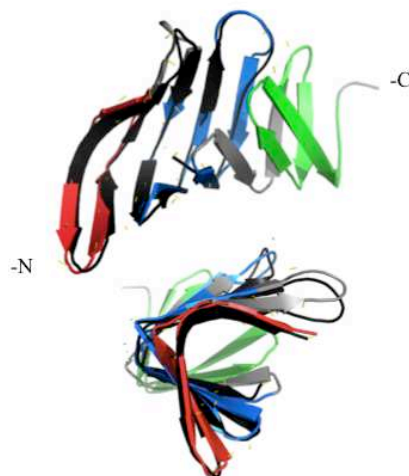

**Figure S2. Crystal structure of *E. coli* LptC and structure prediction of the C-terminally truncated Ec-LptC and of the *P. aeruginosa* LptC orthologue.** Panel A. Structure of *Pa*-LptC (PA4459) and of Ec-LptC $\Delta^{139-191}$  predicted by I-TASSER is shown next to the *Ec*-LptC structure 3MY2 (2). Both Ec-LptC $\Delta^{139-191}$  and *Pa*-LptC are modeled from residue 59, mirroring the lack of structural information in Ec-LptC X-ray structure. Regions corresponding to MEME motifs (Fig. S1A) are coloured as blue, motif 1; red, motif 2; green, motif 3. The non-recognized motif 1 in *Pa*-LptC is indicated in grey. Panel B. Ec-LptC  $\Delta^{139-191}$  (model, depicted in black) and Ec-LptC wild type superimposition (RMSD 0.82 Å)

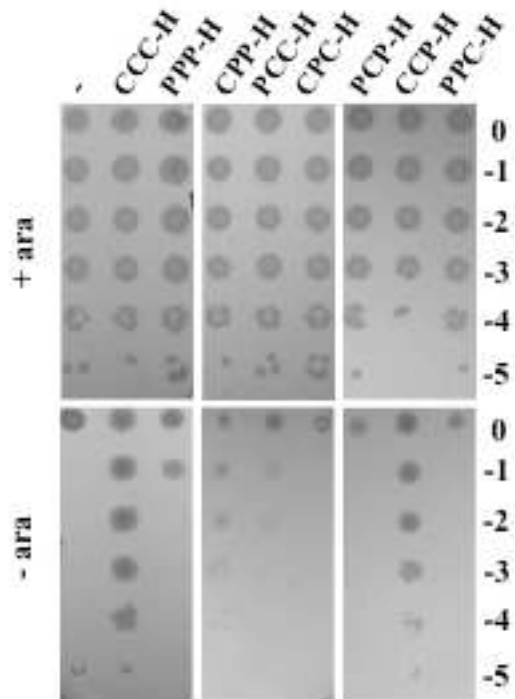

**Figure S3. Complementation test of LptC depletion mutants with *E. coli* and *P. aeruginosa* wild type or chimeric LptC proteins fused to 6xHis-tag.** Cultures of FL905 (*araBp-lptC*) strains freshly transformed with pGS100 derivatives expressing Ec-LptC-H (pGS108, CCC-H), Pa-LptC (pGS200, PPP-H), LptC chimeras fused to 6xHis-tag (pGS201H, CPP-H; pGS202H, PCC-H; pGS203H, CPC-H; pGS204H, PCP-H; pGS206H, CCP-H; pGS207H, PPC-H) and grown in LD-chloramphenicol-arabinose were serially diluted 1:10 in microtiter wells and replica plated in agar plates with (+ ara) or without (- ara) arabinose. The log of the serial dilutions is indicated on the right of the panel.



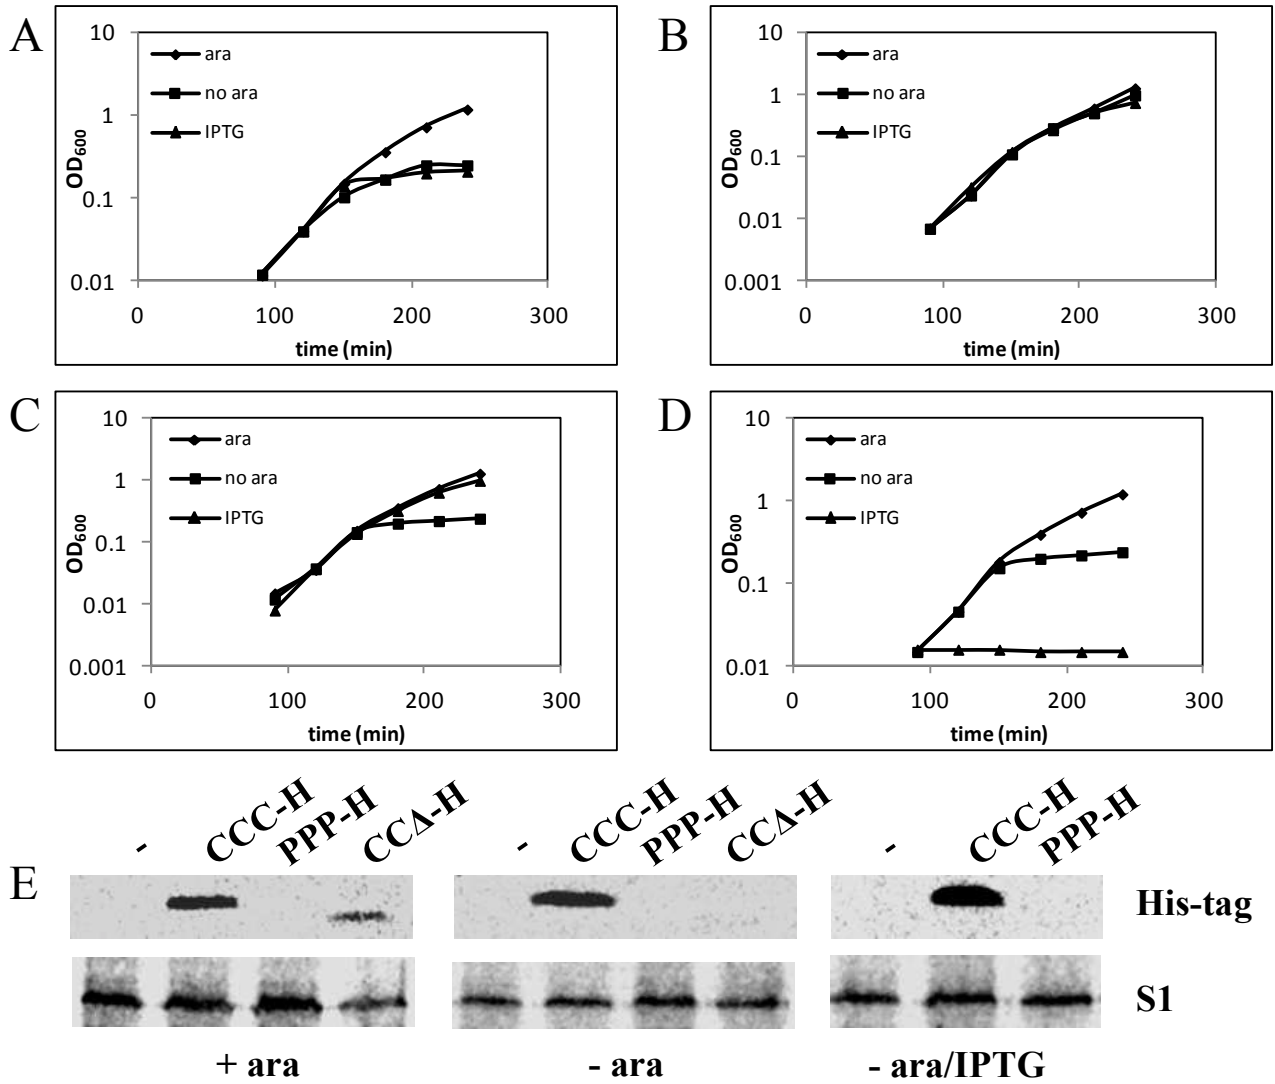

**Figure S4. Growth curve and LptC protein level of FL905 cells complemented with different His tagged wild type or C-terminally truncated LptC proteins.** Bacterial cultures grown in LD-arabinose up to an OD 0.2 were harvested by centrifugation, washed in LD and diluted 500 fold in LD with arabinose (ara) or without arabinose (no ara) or with IPTG (IPTG). FL905 cells were complemented with: pGS100 (-) (panel A), or pGS108 (CCC-H) (panel B), or pGS200 (PPP-H) (panel C) or pGS208H (CCA-H) (panel D). Samples collected 240 min after the shift to the different conditions (panel E) were analyzed by Western blotting using anti-His antibodies to detect the different His-tagged LptC forms. The level of S1 protein was used as loading control using anti-S1 antibodies.

## References

1. **Williams KP, Gillespie JJ, Sobral BW, Nordberg EK, Snyder EE, Shalloom JM, Dickerman AW.** 2010. Phylogeny of gammaproteobacteria. *J Bacteriol* **192**:2305-2314.
2. **Tran AX, Dong C, Whitfield C.** 2010. Structure and functional analysis of LptC, a conserved membrane protein involved in the lipopolysaccharide export pathway in *Escherichia coli*. *J Biol Chem* **285**:33529-33539.
